# Supplementary material
Source: PubMed Central journal article supplement (PMC299953)

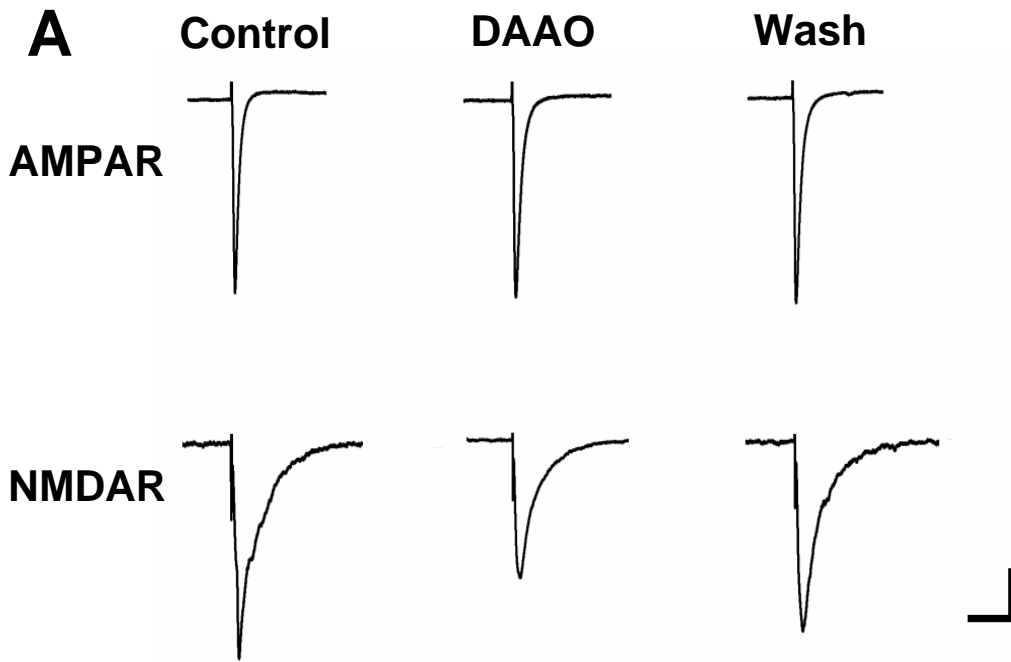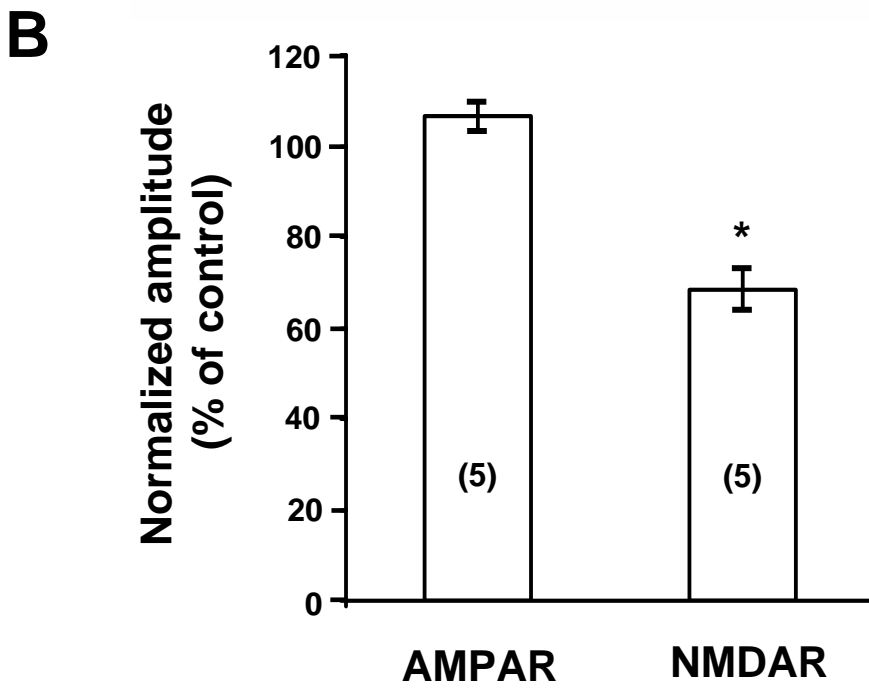

Supplement: pnas_100_25_15194__3.pdf [file pnas_100_25_15194__3.pdf]
